# Supplementary figures and images for: Unexpectedly low recombination rates and presence of hotspots in termite genomes
Source: HighWire-hosted journal article supplement (doi:10.1101/gr.279180.124), 2025-03-20

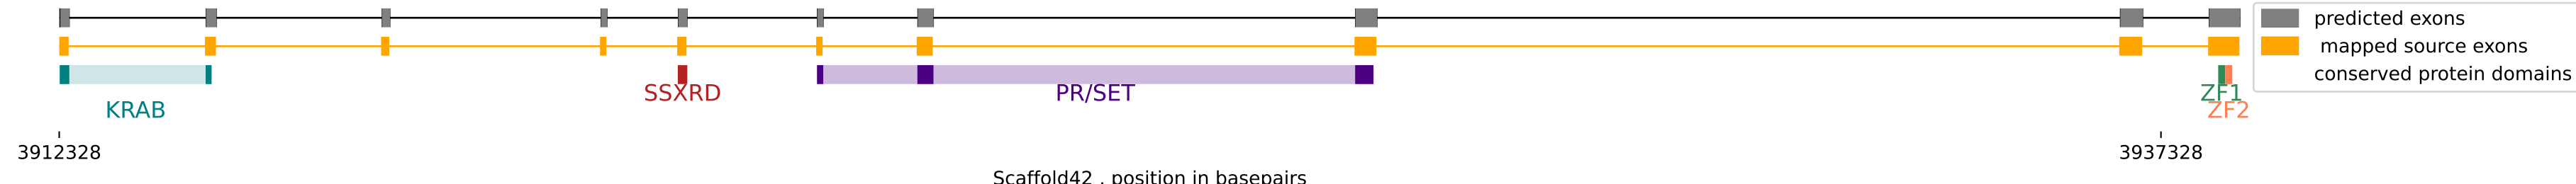

Supplement: Supplemental_Code.zip [file genewise_PRDM9_rev.pdf › termite-recombination-rate-main/REVISIONS/GENEWISE/genewise_PRDM9_rev.pdf]

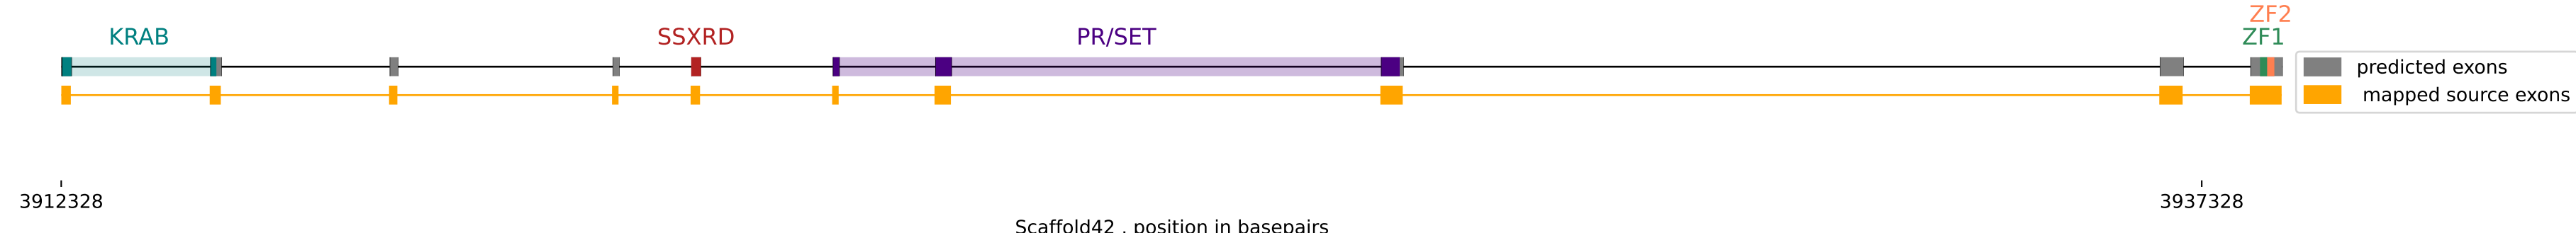

Supplement: Supplemental_Code.zip [file genewise_PRDM9_rev_Mbel.pdf › termite-recombination-rate-main/REVISIONS/GENEWISE/genewise_PRDM9_rev_Mbel.pdf]

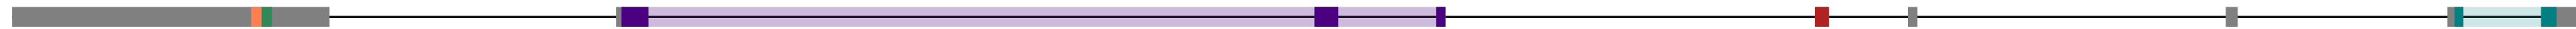

ZF1

ZF2

PR/SET

SSXRD

KRAB

305000 310000 315000 320000 325000

NW\_019719366.1 , position in basepairs

Supplement: Supplemental_Code.zip [file genewise_PRDM9_rev_csec.pdf › termite-recombination-rate-main/REVISIONS/GENEWISE/genewise_PRDM9_rev_csec.pdf]
